# Supplementary material for: Impact of anemia on clinical outcomes of patients with atrial fibrillation: The COOL‐AF registry
Source: PubMed Central journal article supplement (PMC7943899; doi:10.1002/clc.23559), 2021-02-04

## Supplementary materials

**Supplemental Table S1.** Rate of clinical outcomes according to anemia status

| Anemia status              | Number of Patients | Number of events | 100 Person-Years | Rate per 100 Person-Years (95% CI) |
|----------------------------|--------------------|------------------|------------------|------------------------------------|
| <b>Ischemic stroke/TIA</b> |                    |                  |                  |                                    |
| Anemia                     | 518                | 23               | 22.71            | 2.21 (1.40-3.32)                   |
| No anemia                  | 1044               | 23               | 10.40            | 1.01 (0.64-1.52)                   |
| <b>Major bleeding</b>      |                    |                  |                  |                                    |
| Anemia                     | 518                | 46               | 22.71            | 4.42 (3.24-5.90)                   |
| No anemia                  | 1044               | 31               | 10.40            | 1.37 (0.93-1.94)                   |
| <b>Heart failure</b>       |                    |                  |                  |                                    |
| Anemia                     | 518                | 63               | 22.71            | 6.06 (4.66-7.75)                   |
| No anemia                  | 1044               | 72               | 10.40            | 3.17 (2.48-3.99)                   |
| <b>Death</b>               |                    |                  |                  |                                    |
| Anemia                     | 518                | 81               | 22.71            | 7.79 (6.19-9.68)                   |
| No anemia                  | 1044               | 62               | 10.40            | 2.73 (2.09-3.50)                   |

CI = confidence interval, TIA = transient ischemic attack

**Supplemental Figure S1.** Effect of oral anticoagulant (OAC) on clinical outcomes. Rate of ischemic stroke (IS)/transient ischemic attack (TIA), major bleeding (MB), and intracerebral hemorrhage (ICH) according to A. anemia status and OAC treatment B. anemia status and warfarin or NOAC.

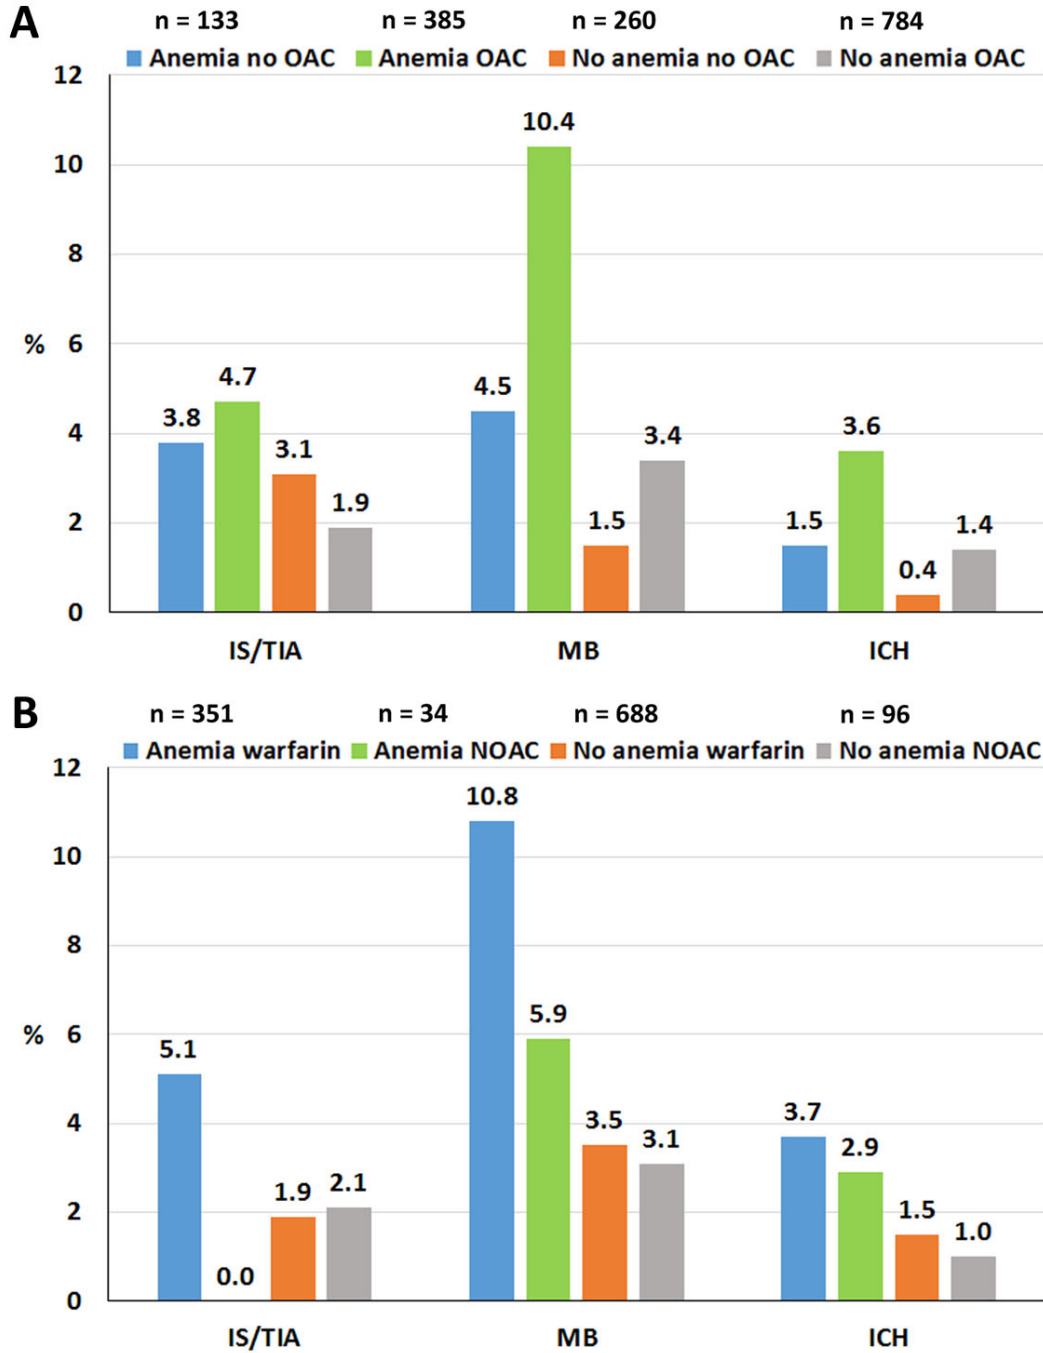

Supplement: CLC-44-415-s001.pdf [file CLC-44-415-s001.pdf]
